# Supplementary material for: New heteroleptic magnesium complexes for MgO thin film application
Source: Royal Society of Chemistry journal article supplement (doi:10.1039/c4dt03497j), 2014-12-01
Supplement: c4dt03497j1.pdf [file c4dt03497j1.pdf]

## New Heteroleptic Magnesium Complexes for MgO Thin Film Applications

Hyo-Suk Kim,<sup>a,b</sup> Sheby Mary George,<sup>a</sup> Bo Keun park,<sup>a</sup> Seung Uk Son,<sup>b</sup> Chang Gyoung Kim,<sup>a\*</sup> and Taek-Mo Chung<sup>a\*</sup>

### Supporting Information

VT-NMR

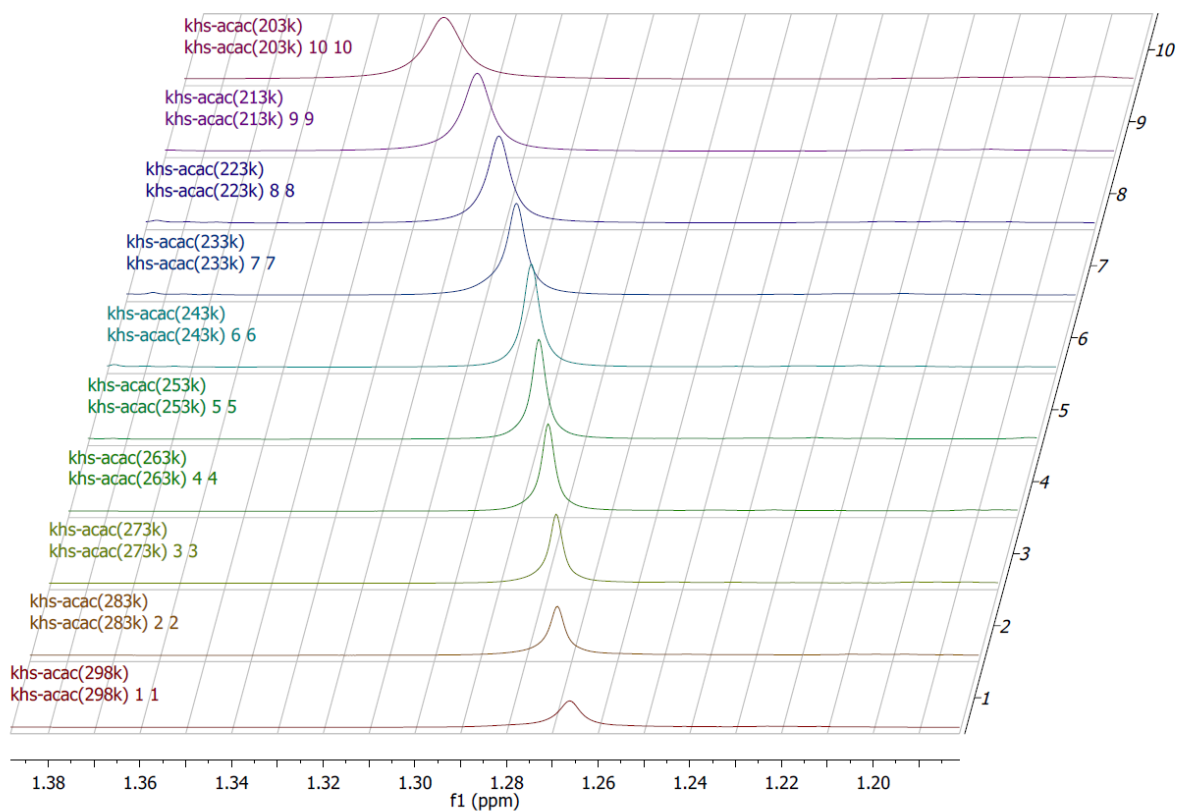

S-1.  $CH_3$  peaks from acac ligands in complex 1

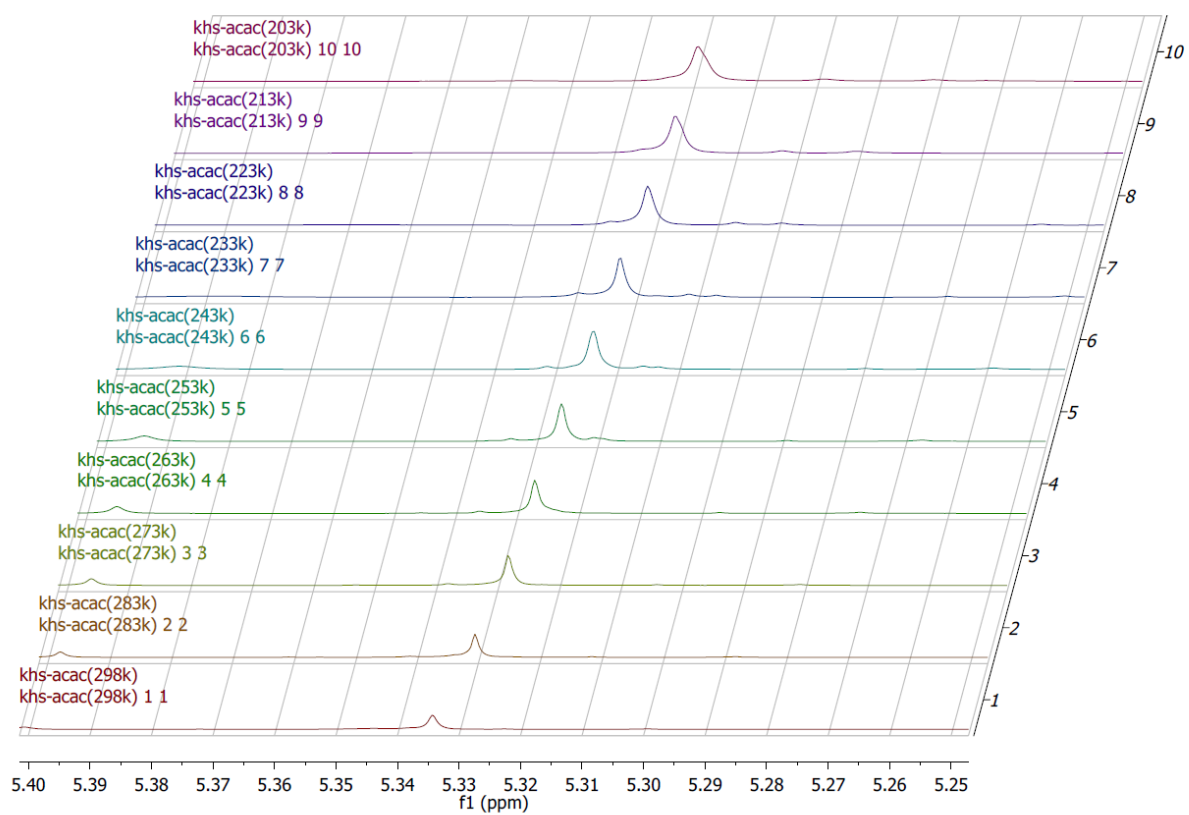

S-2.  $\beta$ -CH protons of acac ligands in complex **1**.

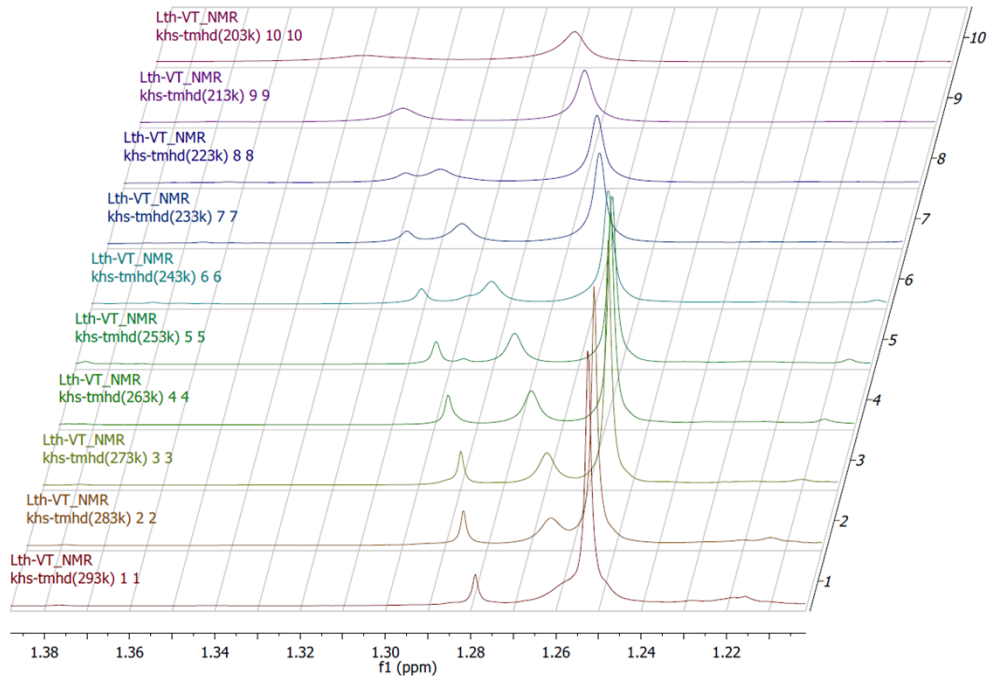

S-3.  $\text{CH}_3$  peaks from tmhd ligands in complex **2**.

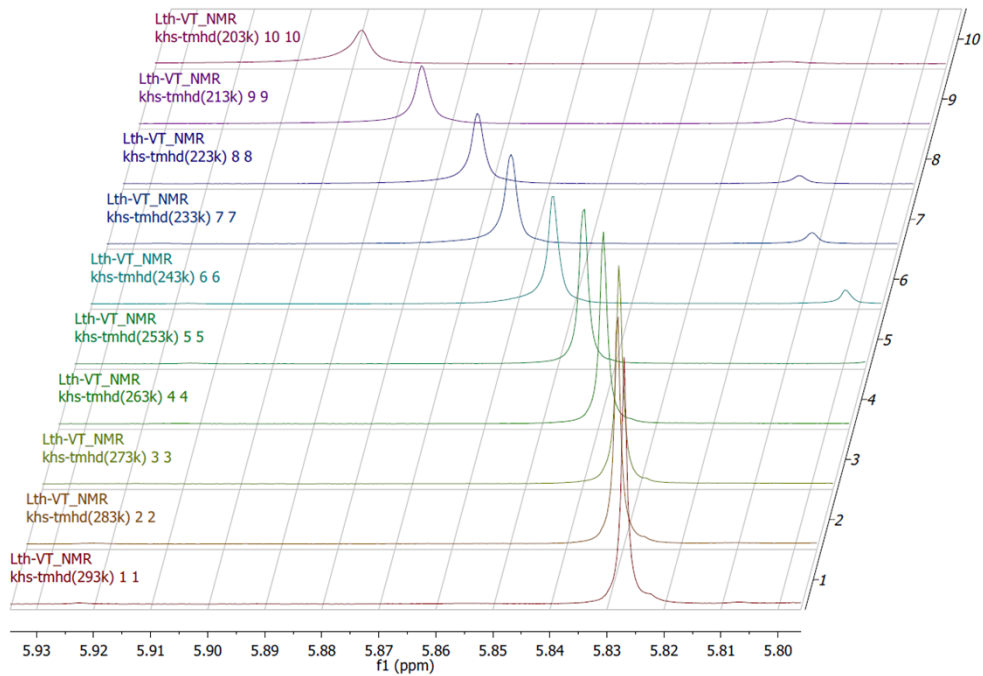

S-4.  $\beta\text{-CH}$  protons of tmhd ligands in complex **2**.

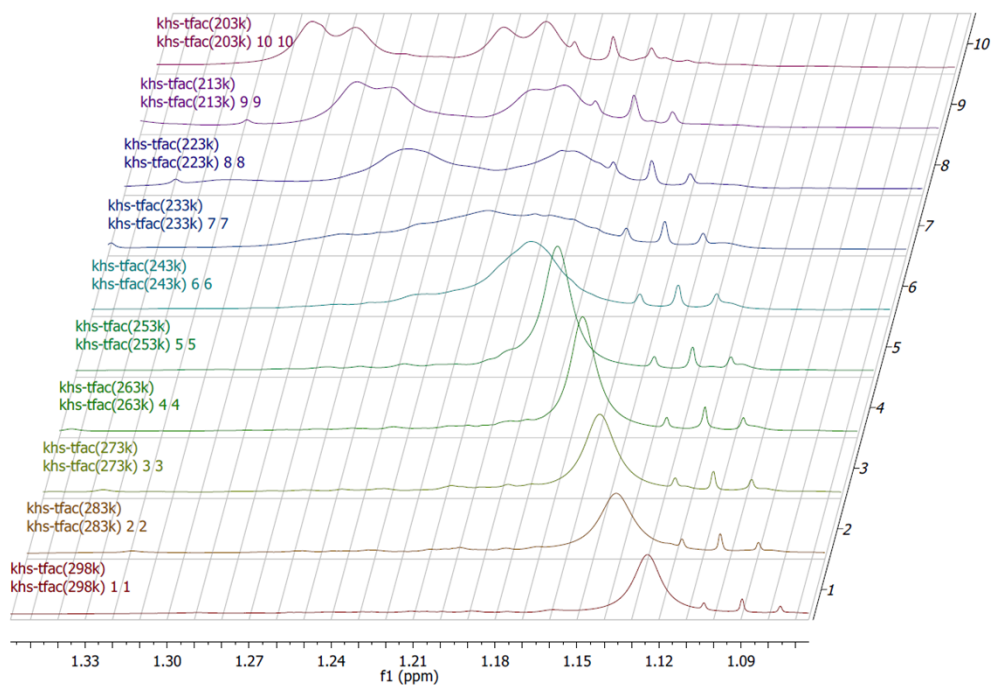

S-5.  $\text{CH}_3$  peaks from tfac ligands in complex **3**.

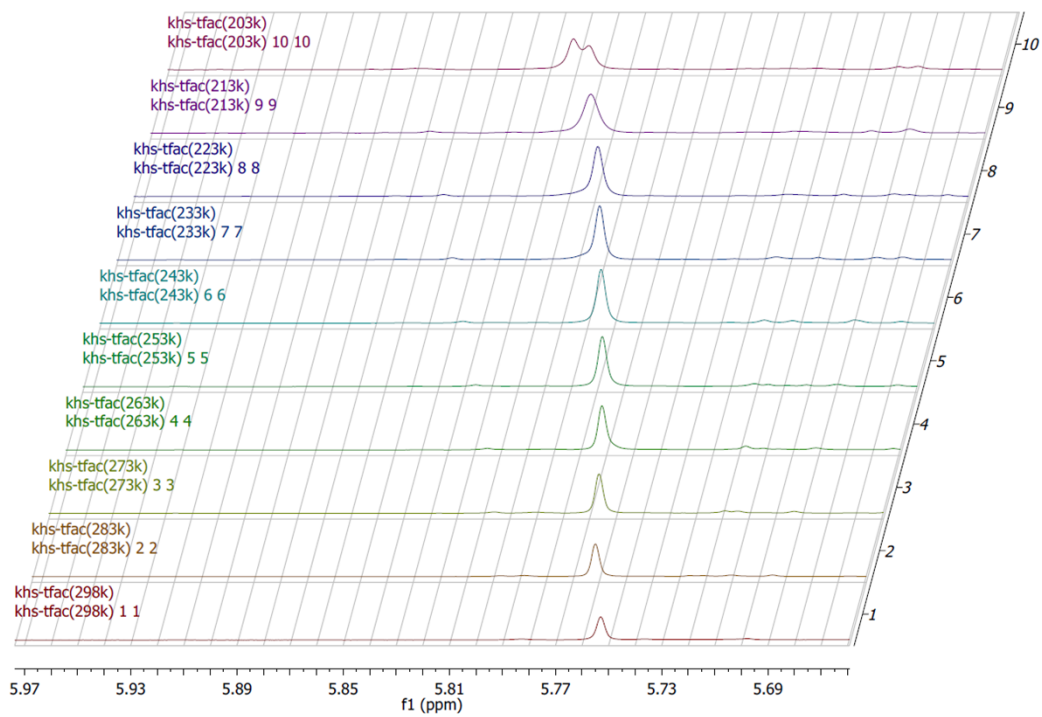

S-6.  $\beta\text{-CH}$  protons of tfac ligands in complex **3**.

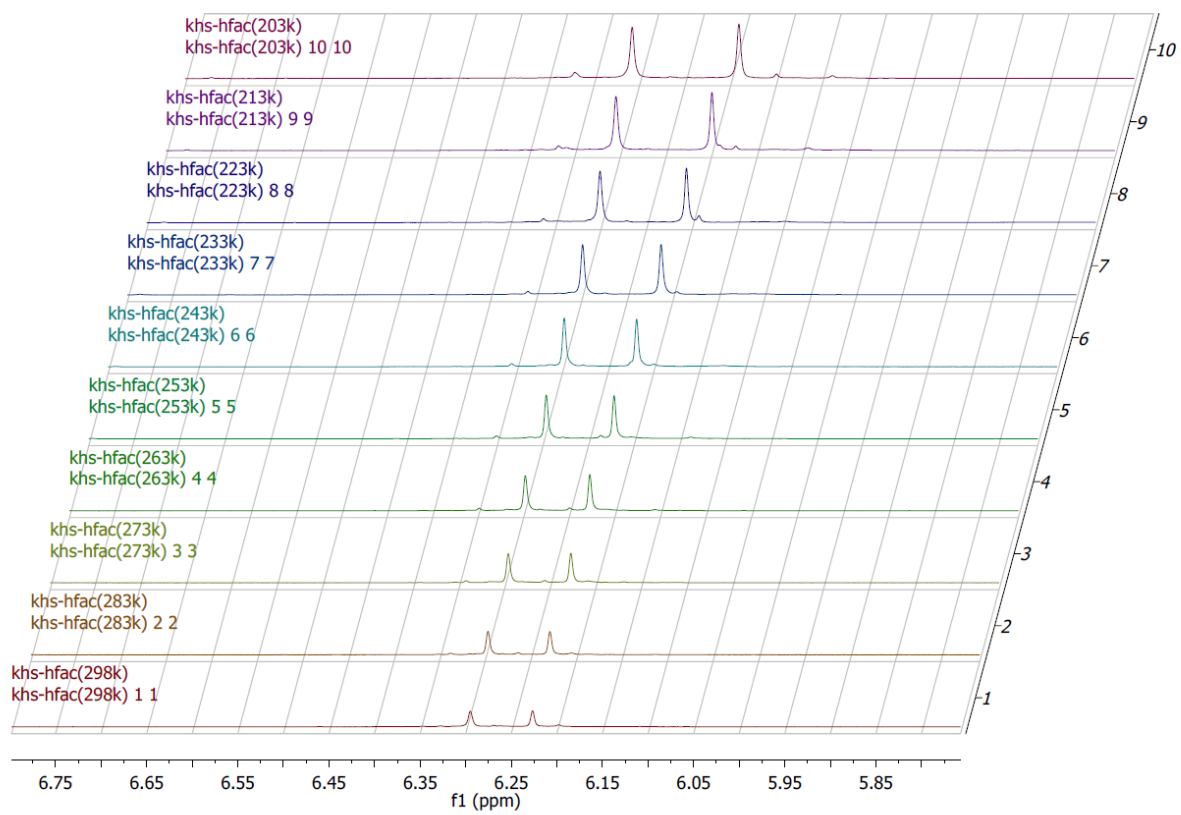

S-7.  $\beta$ -CH protons of hfac ligands in complex 4.
